# Supplementary material for: Frequency and Prognostic Relevance of Volumetric MRI Changes in Contrast- and Non-Contrast-Enhancing Tumor Compartments between Surgery and Radiotherapy of IDHwt Glioblastoma
Source: MDPI journal article supplement (doi:10.3390/cancers15061745), 2023-03-14
Supplement: s1 [file s1]

*Supplementary Materials*

# Frequency and Prognostic Relevance of Volumetric MRI Changes in Contrast- and Non-Contrast-Enhancing Tumor Compartments between Surgery and Radiotherapy of IDHwt Glioblastoma

Nico Teske, Nina C. Teske, Maximilian Niyazi, Claus Belka, Niklas Thon, Joerg-Christian Tonn, Robert Forbrig and Philipp Karschnia

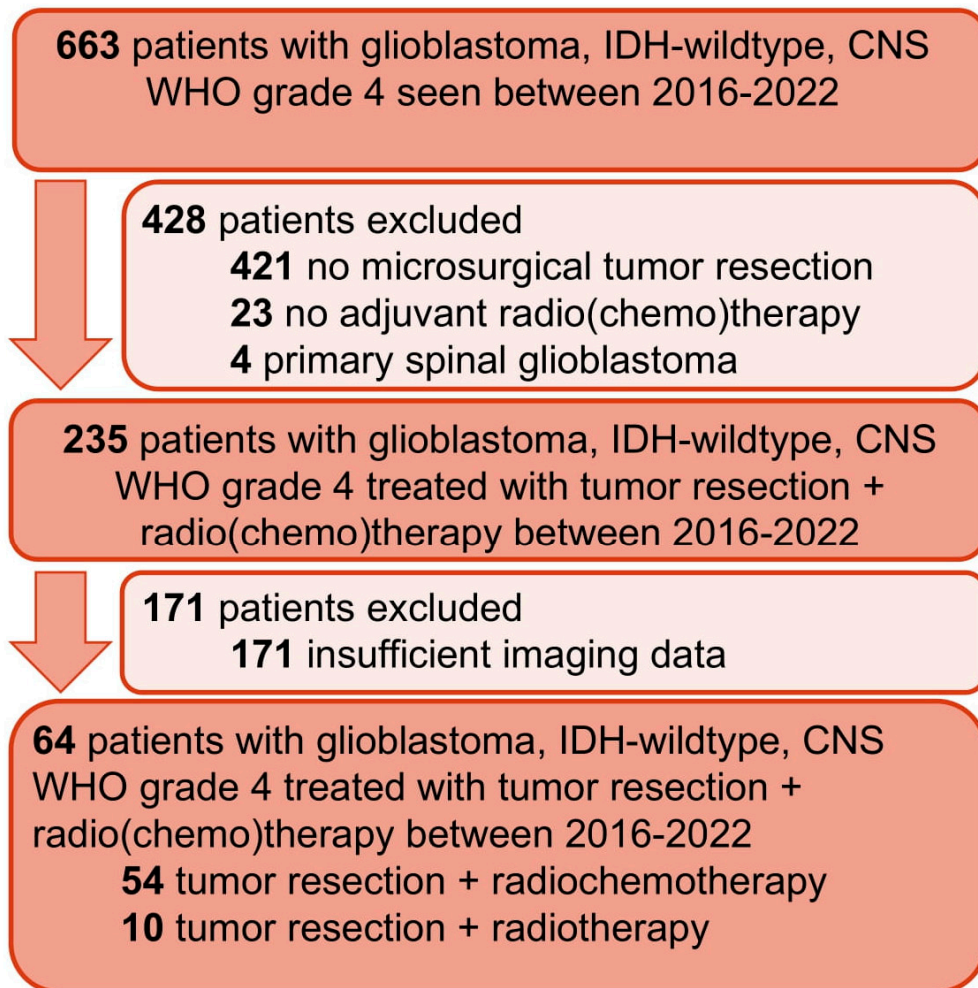

**Figure S1.** Flow diagram of patient selection. Schematic representation reporting the selection of the entire patient cohort of newly diagnosed glioblastoma patients undergoing microsurgical tumor resection at the Centre for Neuro-Oncology at the Ludwig-Maximilians-University School of Medicine (n = 64).
